# Supplementary material
Source: Springer Nature journal article supplement (https://www.springermedizin.de/resource/supplementary/13075_2012_3895_MOESM3_ESM.pdf/9695574)
Supplement: MOESM3 [file 9695574]

Likert scale (0-4)

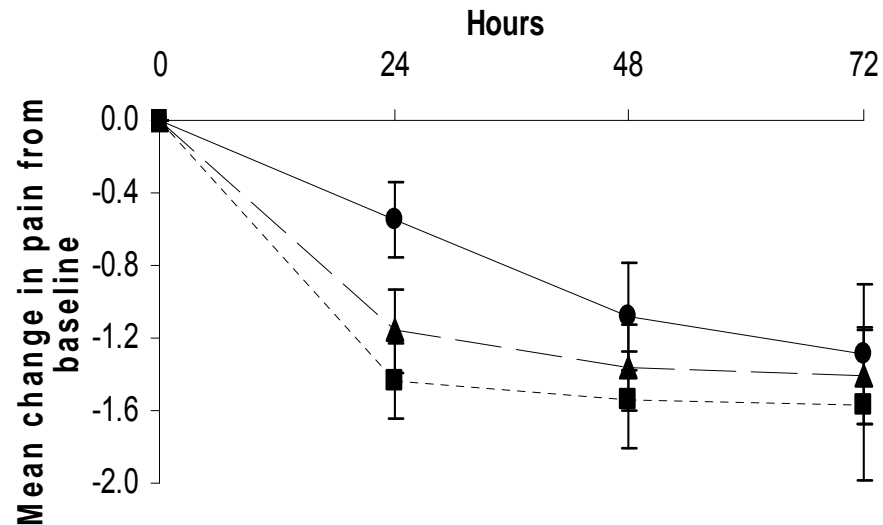

Numerical rating scale (0-10)

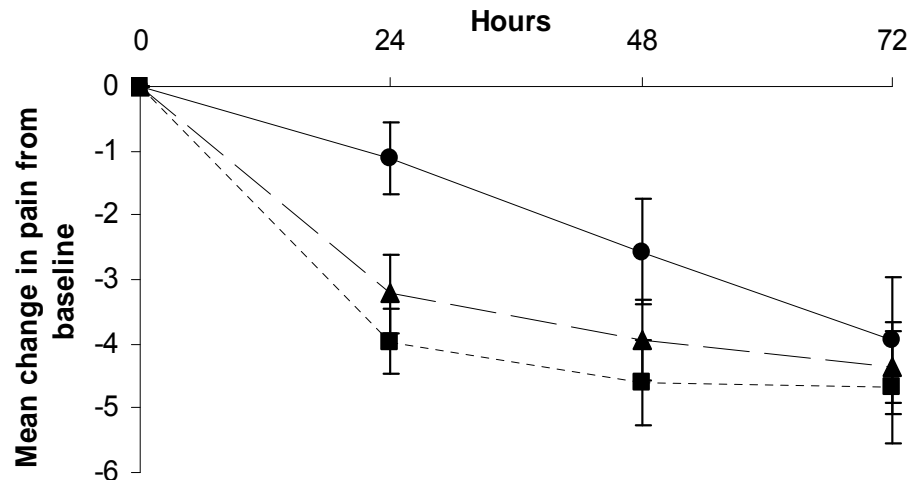

- ▲- SC Placebo + indomethacin (n = 75)
- .....■..... SC Rilonacept + indomethacin (n = 74)
- SC Rilonacept + Placebo (n = 73)
